# Supplementary material
Source: PubMed Central journal article supplement (PMC8891441)

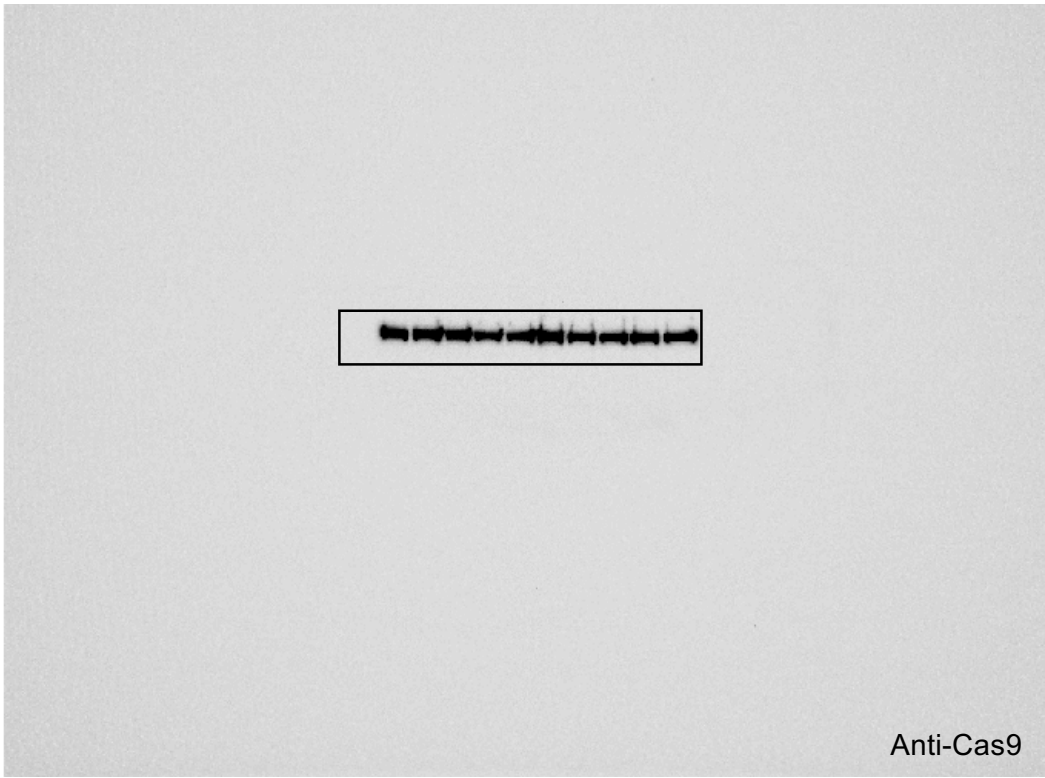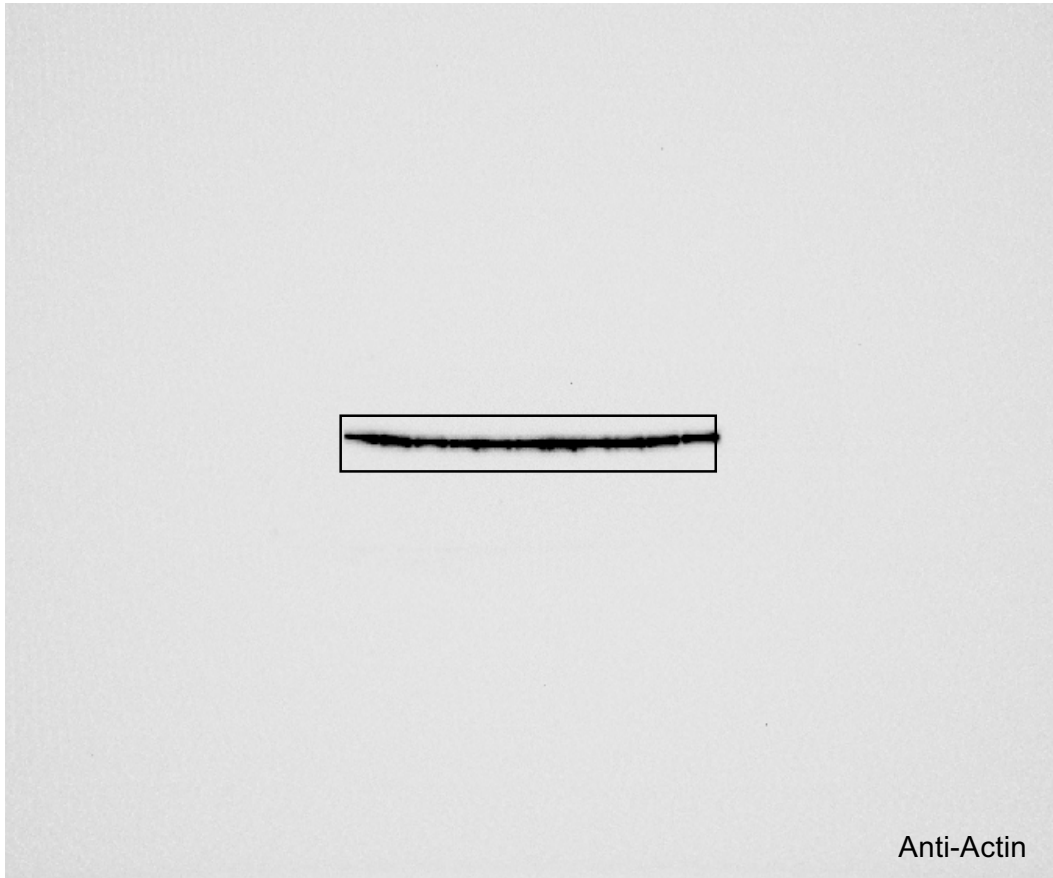

Source Data Extended Data Figure 4b.

Supplement: NIHMS1774320-supplement-Source_Data_for_Extended_Data_Figure_4b.pdf [file NIHMS1774320-supplement-Source_Data_for_Extended_Data_Figure_4b.pdf]
